# Supplementary material for: Establishment of an Arabidopsis callus system to study the interrelations of biosynthesis, degradation and accumulation of carotenoids
Source: PubMed Central journal article supplement (PMC5796706; doi:10.1371/journal.pone.0192158), 2018-02-02
Supplement: pone.0192158.s004.pdf [file pone.0192158.s004.pdf]

## Supplemental Figure S4

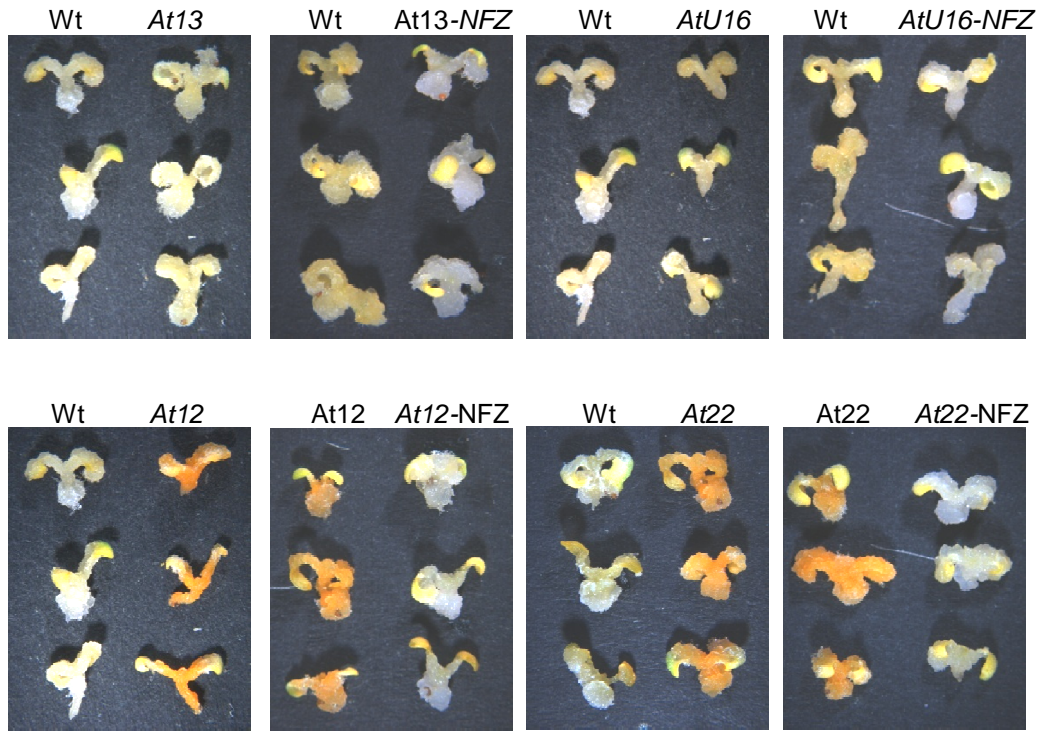

### Supplemental Figure S4: Images of Arabidopsis calli from different *AtPSY*-overexpressing lines

Seedlings were germinated on CIM under long day conditions for 5 days, then etiolated for 14 days. Calli treated with norflurazon (NFZ) were transferred on CIM plates containing 1  $\mu$ M NFZ prior to etiolation. Three representative calli from transgenic lines are shown each.
